# Supplementary material for: Mutations in ZBTB20 in individuals with persistent stuttering
Source: bioRxiv or medRxiv preprint supplement (doi:10.1101/2022.11.03.22281471), 2022-11-07
Supplement: Supplementary file [file media-6.pdf]

*Zbtb20* V719I

Knock In with CRISPR/Cas9

# Founder Report

# Project Goal

- The Jackson Laboratory will introduce a point mutation in the *Zbtb20* gene changing the valine at position 719 to isoleucine.

| Requestor                       |               | Dennis Drayna, NIH - NIDCD, Bethesda                                                                                                                                                                                                                                                                                                                                                                                                              |
|---------------------------------|---------------|---------------------------------------------------------------------------------------------------------------------------------------------------------------------------------------------------------------------------------------------------------------------------------------------------------------------------------------------------------------------------------------------------------------------------------------------------|
| Gene                            | Name          | <i>Zbtb20</i> (zinc finger and BTB domain containing 20)                                                                                                                                                                                                                                                                                                                                                                                          |
|                                 | Location      | Chr16:42875881-43642602 bp, + strand<br><a href="http://www.informatics.jax.org/marker/MGI:1929213">http://www.informatics.jax.org/marker/MGI:1929213</a>                                                                                                                                                                                                                                                                                         |
|                                 | Transcript ID | ENSMUST00000114691.7<br><a href="http://www.ensembl.org">http://www.ensembl.org</a>                                                                                                                                                                                                                                                                                                                                                               |
| Previously Described Phenotypes |               | Mice homozygous for a knock-out allele exhibit growth retardation, disrupted homeostasis, and premature death.<br><a href="http://www.informatics.jax.org">http://www.informatics.jax.org</a>                                                                                                                                                                                                                                                     |
| Model Desired                   |               | V719I                                                                                                                                                                                                                                                                                                                                                                                                                                             |
| Strain (JAX Registry #)         |               | C57BL/6J (JR000664)                                                                                                                                                                                                                                                                                                                                                                                                                               |
| CRISPR                          | Guides        | IDT0911_Zbtb20_V719_crRNA1: GTCAAAC TTTGCTGGGCAGA<br>IDT0912_Zbtb20_V719_crRNA2: CGATTTGGTCAAAC TTTGCT<br>IDT0913_Zbtb20_V719_crRNA3: TCGATTTGGTCAAAC TTTGC                                                                                                                                                                                                                                                                                       |
|                                 | Donor DNA     | 10012_Zbtb20_V719I_donor 1 (Forward; for use with guide 1):<br>ACCCCTCCGGCAGGCACGCCCCAGGTGCCCGCGCGGGTCCGCCAGGCGTGGTGGCCTGCACAGAG<br>GGGACCACTTACGTCTGCTC <b>T</b> A <b>T</b> CTGCCAGCAAAGTTTGACCAAATCGAGCAGTTCAACG<br><br>10012_Zbtb20_V719I_donor 2 (forward; for use with guide 2 or 3):<br>GGCAGGCACGCCCCAGGTGCCCGCGCGGGTCCGCCAGGCGTGGTGGCCTGCACAGAGGGGACCAC<br>TTACGTCTGCTCC <b>A</b> TCTGCCAGC <b>T</b> AAGTTTGACCAAATCGAGCAGTTCAACGACCACATG |

# Mouse *Zbtb20* transcripts

Gene: **Zbtb20** ENSMUSG00000022708

Description zinc finger and BTB domain containing 20 [Source:MGI Symbol;Acc:[MGI:1929213](#)]

Gene Synonyms 1300017A20Rik, 7330412A13Rik, A930017C21Rik, D16Wsu73e, HOF, Zfp288

Location [Chromosome 16: 42,875,881-43,642,602](#) forward strand.  
GRCm38:CM001009.2

About this gene This gene has 21 transcripts ([splice variants](#)), [130 orthologues](#), is a member of [1 Ensembl protein family](#) and is associated with [42 phenotypes](#).

Transcripts

Hide transcript table

| Name       | Transcript ID                         | bp    | Protein               | Biotype              | CCDS                      | UniProt                | RefSeq                                                       | Flags                           |
|------------|---------------------------------------|-------|-----------------------|----------------------|---------------------------|------------------------|--------------------------------------------------------------|---------------------------------|
| Zbtb20-201 | <a href="#">ENSMUST00000079441.12</a> | 3086  | <a href="#">741aa</a> | Protein coding       | <a href="#">CCDS28178</a> | <a href="#">Q8K0L9</a> | <a href="#">NM_019778</a><br><a href="#">NP_062752</a>       | TSL:5 GENCODE basic APPRIS P3   |
| Zbtb20-202 | <a href="#">ENSMUST00000114690.7</a>  | 2759  | <a href="#">668aa</a> | Protein coding       | <a href="#">CCDS49851</a> | <a href="#">Q8K0L9</a> | -                                                            | TSL:1 GENCODE basic APPRIS ALT2 |
| Zbtb20-203 | <a href="#">ENSMUST00000114691.7</a>  | 2891  | <a href="#">668aa</a> | Protein coding       | <a href="#">CCDS49851</a> | <a href="#">Q8K0L9</a> | <a href="#">NM_181058</a><br><a href="#">NP_851401</a>       | TSL:1 GENCODE basic APPRIS ALT2 |
| Zbtb20-204 | <a href="#">ENSMUST00000114694.8</a>  | 26901 | <a href="#">741aa</a> | Protein coding       | <a href="#">CCDS28178</a> | <a href="#">Q8K0L9</a> | <a href="#">NM_001285805</a><br><a href="#">NP_001272734</a> | TSL:5 GENCODE basic APPRIS P3   |
| Zbtb20-205 | <a href="#">ENSMUST00000114695.2</a>  | 2977  | <a href="#">741aa</a> | Protein coding       | <a href="#">CCDS28178</a> | <a href="#">Q8K0L9</a> | -                                                            | TSL:1 GENCODE basic APPRIS P3   |
| Zbtb20-206 | <a href="#">ENSMUST00000122875.7</a>  | 736   | No protein            | Processed transcript | -                         | -                      | -                                                            | TSL:3                           |
| Zbtb20-207 | <a href="#">ENSMUST00000123047.7</a>  | 439   | <a href="#">3aa</a>   | Protein coding       | -                         | -                      | -                                                            | CDS 3' incomplete TSL:3         |
| Zbtb20-208 | <a href="#">ENSMUST00000126100.7</a>  | 463   | <a href="#">3aa</a>   | Protein coding       | -                         | -                      | -                                                            | CDS 3' incomplete TSL:5         |
| Zbtb20-209 | <a href="#">ENSMUST00000126354.7</a>  | 563   | No protein            | Retained intron      | -                         | -                      | -                                                            | TSL:3                           |
| Zbtb20-210 | <a href="#">ENSMUST00000131689.7</a>  | 425   | No protein            | Processed transcript | -                         | -                      | -                                                            | TSL:2                           |
| Zbtb20-211 | <a href="#">ENSMUST00000132881.7</a>  | 418   | No protein            | Processed transcript | -                         | -                      | -                                                            | TSL:3                           |
| Zbtb20-212 | <a href="#">ENSMUST00000134537.2</a>  | 645   | No protein            | Retained intron      | -                         | -                      | -                                                            | TSL:3                           |
| Zbtb20-213 | <a href="#">ENSMUST00000139491.7</a>  | 2063  | No protein            | Retained intron      | -                         | -                      | -                                                            | TSL:1                           |
| Zbtb20-214 | <a href="#">ENSMUST00000141941.7</a>  | 414   | No protein            | Processed transcript | -                         | -                      | -                                                            | TSL:3                           |
| Zbtb20-215 | <a href="#">ENSMUST00000146708.7</a>  | 821   | <a href="#">75aa</a>  | Protein coding       | -                         | <a href="#">E0CXK1</a> | -                                                            | CDS 3' incomplete TSL:3         |
| Zbtb20-216 | <a href="#">ENSMUST00000148775.7</a>  | 590   | <a href="#">60aa</a>  | Protein coding       | -                         | <a href="#">E0CXT9</a> | -                                                            | CDS 3' incomplete TSL:3         |
| Zbtb20-217 | <a href="#">ENSMUST00000151244.7</a>  | 754   | <a href="#">63aa</a>  | Protein coding       | -                         | <a href="#">E0CX28</a> | -                                                            | CDS 3' incomplete TSL:3         |
| Zbtb20-218 | <a href="#">ENSMUST00000151290.7</a>  | 593   | No protein            | Retained intron      | -                         | -                      | -                                                            | TSL:3                           |
| Zbtb20-219 | <a href="#">ENSMUST00000156367.7</a>  | 787   | <a href="#">131aa</a> | Protein coding       | -                         | <a href="#">E0CYJ9</a> | -                                                            | CDS 3' incomplete TSL:3         |
| Zbtb20-220 | <a href="#">ENSMUST00000156981.7</a>  | 837   | <a href="#">138aa</a> | Protein coding       | -                         | <a href="#">E0CYH3</a> | -                                                            | CDS 3' incomplete TSL:3         |
| Zbtb20-221 | <a href="#">ENSMUST00000162745.7</a>  | 267   | No protein            | Processed transcript | -                         | -                      | -                                                            | TSL:5                           |

Project Goal: Introduce a point mutation in the *Zbtb20* gene (V719I).

[www.ensembl.org](http://www.ensembl.org)

# Mouse *Zbtb20* transcripts

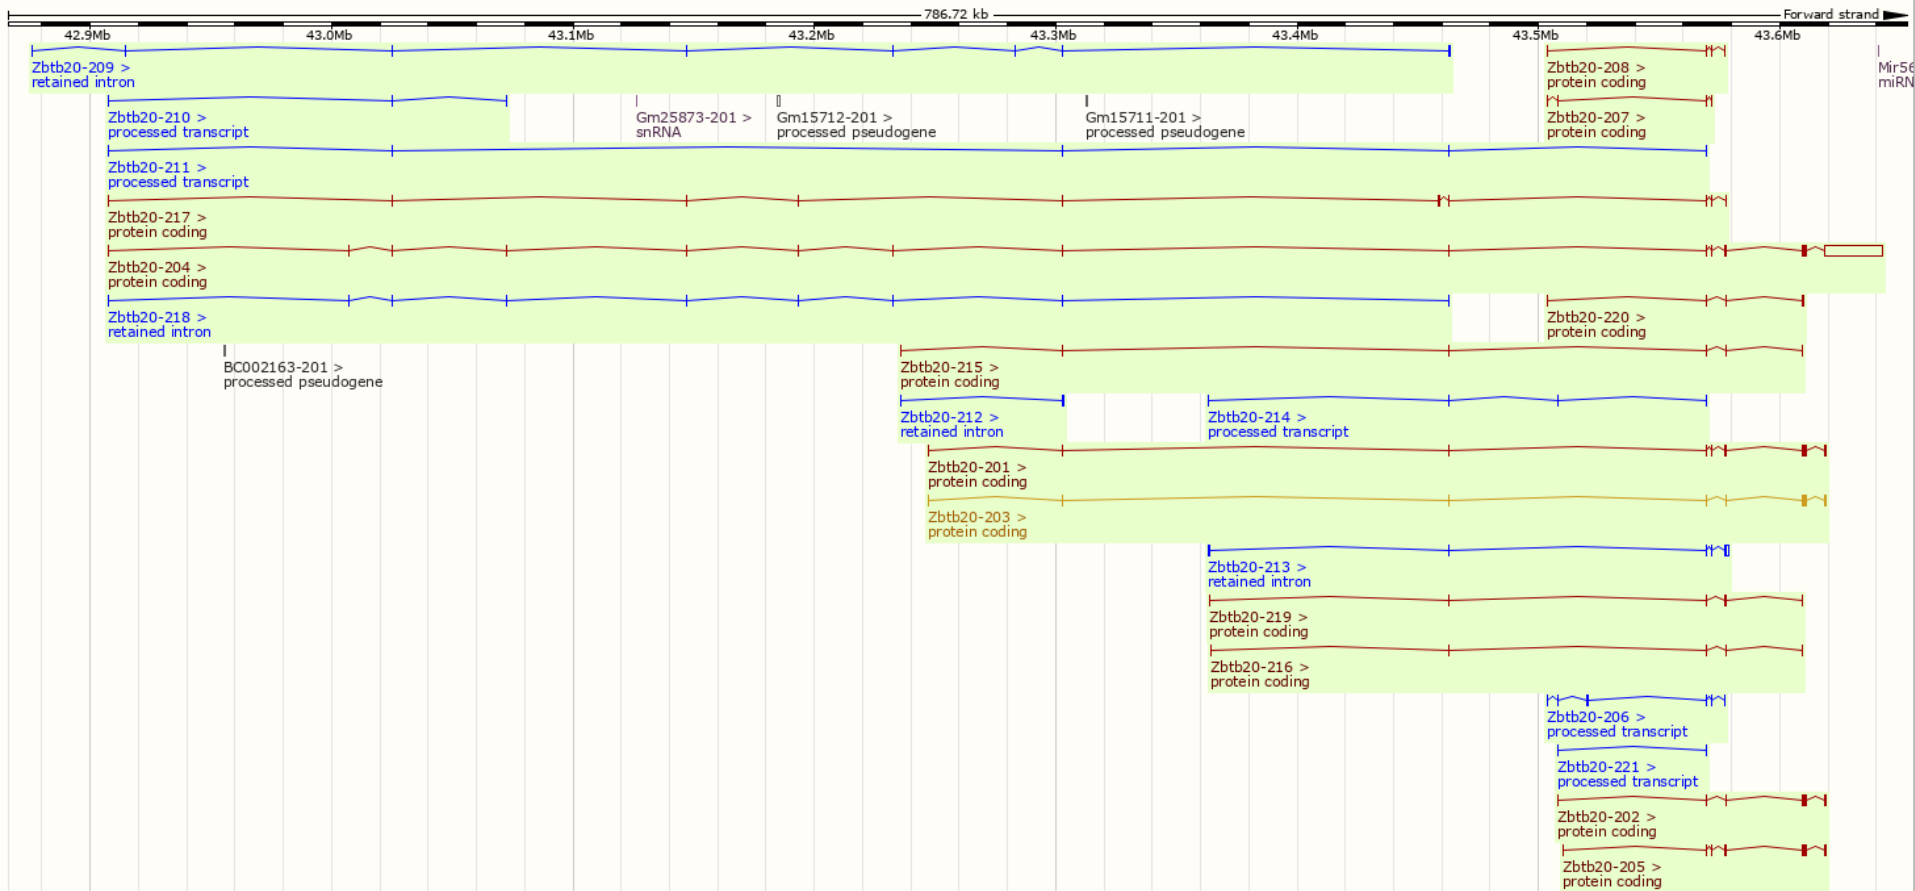

Project Goal: Introduce a point mutation in the *Zbtb20* gene (V719I).

[www.ensembl.org](http://www.ensembl.org)

# Zbtb20 V719I- Targeting Strategy 1

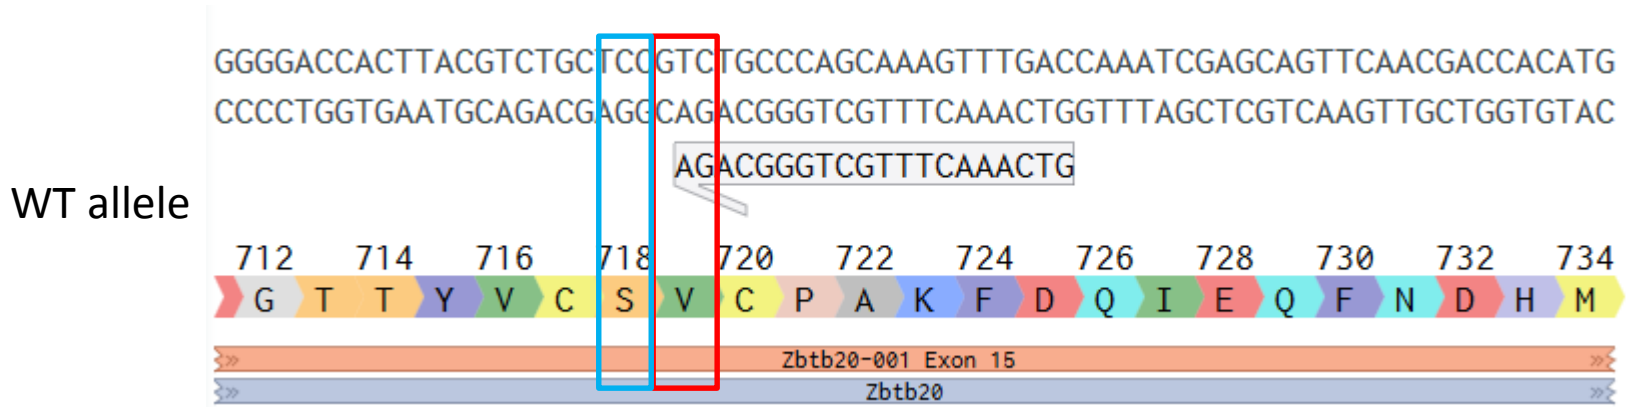

\*Silent Mutation

TCC>TCT

V719I; GTC > ATC

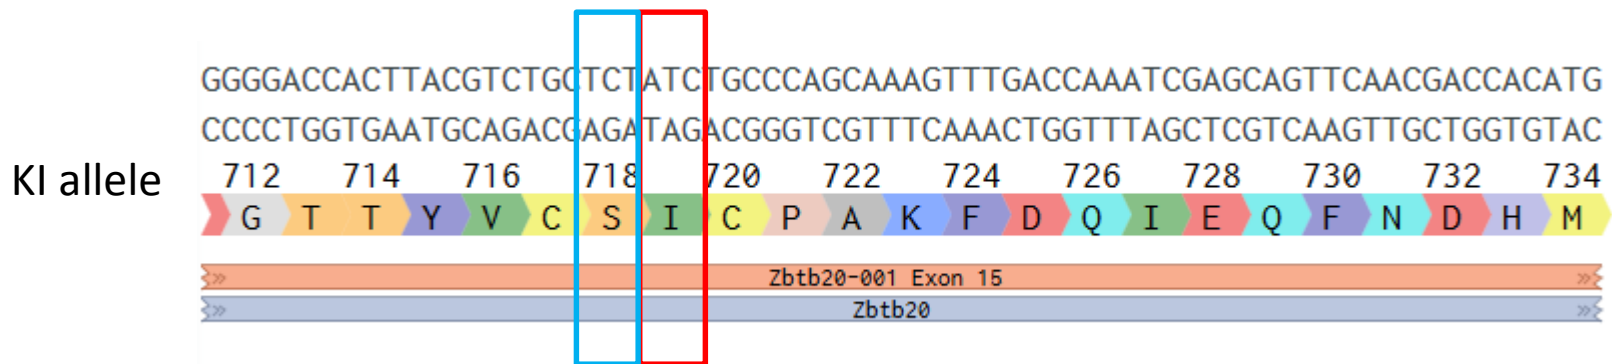

# Zbtb20 V719I- Targeting Strategy 2

WT allele

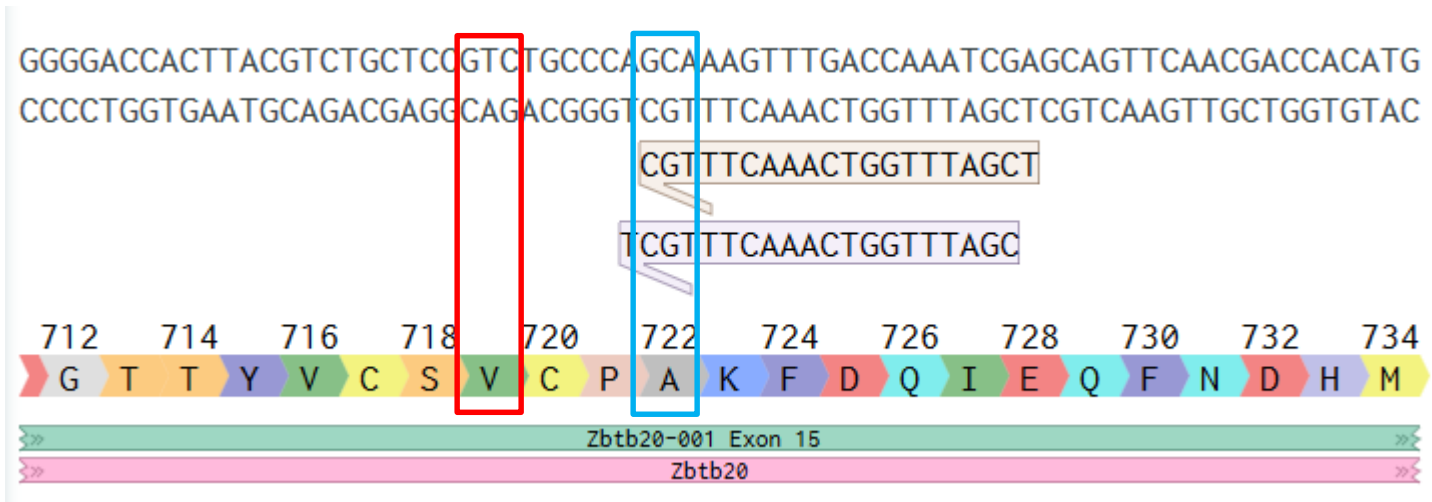

\*Silent Mutation

GCA>GCT

V719I; GTC > ATC

KI allele

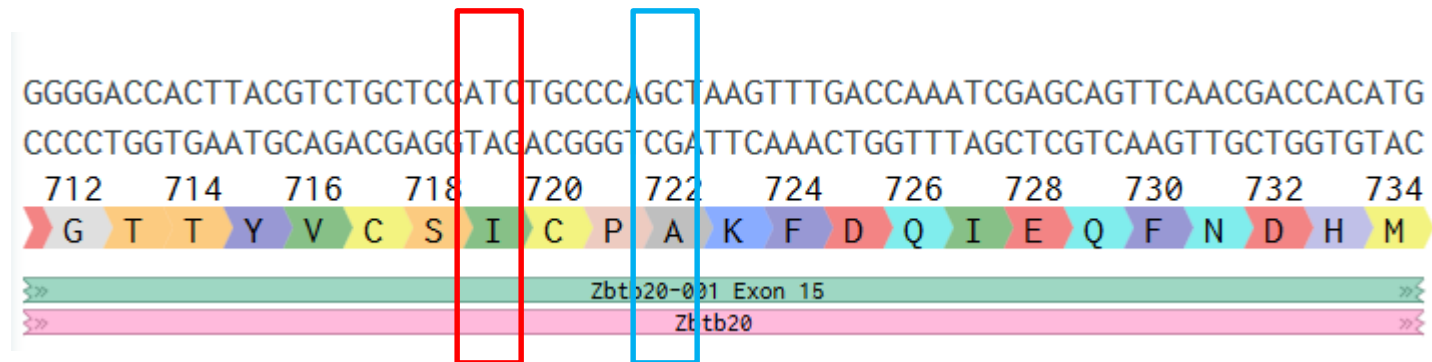

# Zbtb20 V719I– Potential Off-Target Sites

Zbtb20\_V719\_crRNA1: GTCAAACCTTTGCTGGGCAGA

| Sequence              | PAM | Score | Gene                           | Locus           |
|-----------------------|-----|-------|--------------------------------|-----------------|
| GTCAAACCTTTGCTGGGCAGA | CGG | 100.0 | Zbtb20<br>(ENSMUSG00000022708) | chr16:-43618677 |
| TTTCAACTTTGCTGGGCAGA  | CAG | 2.4   |                                | chr15:-44730934 |
| ATAGAACCTTTGCTGGGCAGA | AAG | 1.5   |                                | chr9:-85801466  |
| CTCAATCTTTGCTGGGCAGC  | TAG | 1.2   |                                | chr12:+65392930 |

Zbtb20\_V719\_crRNA2: CGATTTGGTCAAACCTTTGCT

| Sequence              | PAM | Score | Gene                           | Locus           |
|-----------------------|-----|-------|--------------------------------|-----------------|
| CGATTTGGTCAAACCTTTGCT | GGG | 100.0 | Zbtb20<br>(ENSMUSG00000022708) | chr16:-43618684 |
| TCATTTGGTTAAACTTTGCT  | GAG | 2.7   |                                | chr7:+87971054  |
| TTAATTGGTCAAACCTTTGCT | GGG | 2.4   |                                | chr14:+12226611 |
| CGGGTTGGCCAAACTTTGCT  | TAG | 1.6   |                                | chr1:+191432251 |
| CTATGTGCTTAAACTTTGCT  | GAG | 1.4   |                                | chr16:-88425655 |

Zbtb20\_V719\_crRNA3: TCGATTTGGTCAAACCTTTGC

| Sequence              | PAM | Score | Gene                           | Locus           |
|-----------------------|-----|-------|--------------------------------|-----------------|
| TCGATTTGGTCAAACCTTTGC | TGG | 100.0 | Zbtb20<br>(ENSMUSG00000022708) | chr16:-43618685 |
| TTTAATTGGTCAAACCTTTGC | TGG | 2.4   |                                | chr14:+12226610 |
| TTAATGTGGTCAAACCTTTGC | TAG | 1.5   |                                | chr9:-52623784  |
| TGGATTTGGACAAACTTTCC  | AAG | 1.2   |                                | chr3:-104528297 |
| CAGACTGGGTCAAACCTTTGC | CAG | 1.0   |                                | chr9:+110042760 |

Off-target scoring: Higher off-target editing risk when score is >2.0 with a canonical PAM (NGG) or >50.0 with a unlinked non-canonical PAM (NAG) or >20.0 with a linked non-canonical PAM in a coding region.



# Zbtb20 V719I– Sequencing Strategy

KI allele

|             |             |            |            |            |            |            |            |             |            |            |     |     |     |     |     |     |     |     |     | Glu | Lys | Pro | His | Gln | Cys | Ser | Ile | Cys | Trp | Arg |     |     |     |
|-------------|-------------|------------|------------|------------|------------|------------|------------|-------------|------------|------------|-----|-----|-----|-----|-----|-----|-----|-----|-----|-----|-----|-----|-----|-----|-----|-----|-----|-----|-----|-----|-----|-----|-----|
| TCTCATTCTC  | CCACTCTGGC  | TGTGTCTTGT | TCTGTCTCTG | TTGCTGTCTC | CTCCCGCCTC | ACCAG      | GTGAG      | AAGCCCCACC  | AGTGCAGCAT | CTGCTGGCGC |     |     |     |     |     |     |     |     |     |     |     |     |     |     |     |     |     |     |     |     |     |     |     |
| AGAGTAAGAG  | GGTGAGACCG  | ACACAGAACA | AGACAGGACG | AACGACAGAG | GAGGGCGGAG | TGGTCC     | CACTC      | TTCGGGGTGG  | TCACGTCTGA | GACGACCGCG |     |     |     |     |     |     |     |     |     |     |     |     |     |     |     |     |     |     |     |     |     |     |     |
| Ser         | Phe         | Ser        | Leu        | Lys        | Asp        | Tyr        | Leu        | Ile         | Lys        | His        | Met | Val | Thr | His | Thr | Gly | Val | Arg | Ala | Tyr | Gln | Cys | Ser | Ile | Cys | Asn | Lys | Arg | Phe | Thr | Gln | Lys | Ser |
| TCCTTCTCT   | TGAAGGATTA  | CCTTATCAAG | CACATGGTGA | CGCACACCGG | CGTGAGAGGG | TACCAGTGTA | GCATCTGCAA | CAAGCGCTTC  | ACCCAGAAGA |            |     |     |     |     |     |     |     |     |     |     |     |     |     |     |     |     |     |     |     |     |     |     |     |
| AGGAAGAGGA  | ACTTCCTAAT  | GGAATAGTTC | GTGTACCACT | GCGTGTGGCC | GCACTCTCGC | ATGGTCACAT | CGTAGACGTT | GTTTCGCGAAG | TGGGTCCTCT |            |     |     |     |     |     |     |     |     |     |     |     |     |     |     |     |     |     |     |     |     |     |     |     |
| Ser         | Ser         | Leu        | Asn        | Val        | His        | Met        | Arg        | Leu         | His        | Arg        | Gly | Glu | Lys | Ser | Tyr | Glu | Cys | Tyr | Ile | Cys | Lys | Lys | Lys | Phe | Ser | His | Lys | Thr | Leu | Leu | Glu | Arg | His |
| GTTCCCTCAA  | CGTGCACATG  | CGCCTGCACC | GCGGGGAGAA | GTCCTATGAG | TGCTACATCT | GCAAAAAGAA | GTCTCCAC   | AAGACCCTGC  | TGGAGCGACA |            |     |     |     |     |     |     |     |     |     |     |     |     |     |     |     |     |     |     |     |     |     |     |     |
| CAAGGGAGTT  | GCACGTGTAC  | GCGGACGTGG | GCCCCCTCT  | CAGGATACTC | ACGATGTAGA | CGTTTTTCTT | CAAGAGGGTG | TTCTGGGACG  | ACCTCGCTGT |            |     |     |     |     |     |     |     |     |     |     |     |     |     |     |     |     |     |     |     |     |     |     |     |
| His         | Val         | Ala        | Leu        | His        | Ser        | Ala        | Ser        | Asn         | Gly        | Thr        | Pro | Pro | Ala | Gly | Thr | Pro | Pro | Gly | Ala | Arg | Ala | Gly | Pro | Pro | Gly | Val | Val | Ala | Cys | Thr | Glu | Gly | Thr |
| CGTGGCCCTG  | CACAGTGCCA  | GCAACGGGAC | CCCTCCGGCA | GGCACGCCCC | CAGGTGCCCG | CGCGGGTCCG | CCAGGCCTGG | TGGCCTGCAC  | AGAGGGGACC |            |     |     |     |     |     |     |     |     |     |     |     |     |     |     |     |     |     |     |     |     |     |     |     |
| GCACCGGGAC  | GTGTCACGGT  | CGTTGCCCTG | GGGAGGCCGT | CCGTGCGGGG | GTCCACGGGC | GCGCCAGGC  | GGTCCGCACC | ACCGGACGTG  | TCTCCCTGG  |            |     |     |     |     |     |     |     |     |     |     |     |     |     |     |     |     |     |     |     |     |     |     |     |
| Thr         | Tyr         | Val        | Cys        | Ser        | Ile        | Cys        | Pro        | Ala         | Lys        | Phe        | Asp | Gln | Ile | Glu | Gln | Phe | Asn | Asp | His | Met | Arg | Met | His | Val | Ser | Asp | Gly | *** |     |     |     |     |     |
| ACTTACGICT  | GCTCTATCTG  | CCCAGCAAAG | TTTGACCAA  | TCGAGCAGTT | CAACGACCAC | ATGAGGATGC | ATGTGTCTGA | CGGATAAGTA  | GTACCTTTCT |            |     |     |     |     |     |     |     |     |     |     |     |     |     |     |     |     |     |     |     |     |     |     |     |
| TGAATGCAGA  | CGAGATAGAC  | GGGTGTTTC  | AAACTGGTTC | AGCTCGTCAA | GTTGCTGGTG | TACTCCTACG | TACACAGACT | GCCTATTCAT  | CATGAAAGA  |            |     |     |     |     |     |     |     |     |     |     |     |     |     |     |     |     |     |     |     |     |     |     |     |
| CTCTTTCTTA  | CGAACCAAAC  | AAAACGACAA | CAAAAGAAAT | AAACAAGCAA | ACAAACAGAC | AAAAAGCTAT | GGCACTAGAA | TTTAAGAAAT  | GTTTTGGTTT |            |     |     |     |     |     |     |     |     |     |     |     |     |     |     |     |     |     |     |     |     |     |     |     |
| GAGAAAGAAAT | GCTTGGTTTTG | TTTTGCTGTT | GTTTTCTTTA | TTTGTTCGTT | TGTTTGTCTG | TTTTTCGATA | CCGTGATCTT | AAATTCTTTA  | CAAAACCAA  |            |     |     |     |     |     |     |     |     |     |     |     |     |     |     |     |     |     |     |     |     |     |     |     |
| CCTTTTTACT  | TTCTGTTTTT  | GTTTCTGTTT | CGTTTCATTT | TGTACTACAT | GAAGAAGTGT | TTTTTGCCTG | CTGGTACATT | ACATTTCCGG  | GGGCTTGGGT |            |     |     |     |     |     |     |     |     |     |     |     |     |     |     |     |     |     |     |     |     |     |     |     |
| GGAAAAATGA  | AAGACAAAAA  | CAAAGACAAG | GCAAAGTAAA | ACATGATGTA | CTTCTTGACA | AAAAACGGAC | GACCATGTAA | TGTAAGGCC   | CCCGAACCCA |            |     |     |     |     |     |     |     |     |     |     |     |     |     |     |     |     |     |     |     |     |     |     |     |
| GGATAATACT  | TTTCCAGTIC  | CCCTTGGAT  | GGTGGCCTTA | AGGCCTGGTA | GTGCTTCAGG | AGGTCCACTG | GTGGATCTC  | TAGCTACTGG  | CCTCTAAATA |            |     |     |     |     |     |     |     |     |     |     |     |     |     |     |     |     |     |     |     |     |     |     |     |
| CCTATTATGA  | AAAGGTCAG   | GGGGAACCTA | CCACCGGAAT | TCCGGACCAT | CACGAAGTCC | TCCAGGTGAC | CAACCTAGAG | ATCGATGACC  | GGAGATTTAT |            |     |     |     |     |     |     |     |     |     |     |     |     |     |     |     |     |     |     |     |     |     |     |     |

## #1: Product of length 524 (rating: 175)

Contains region of the molecule from 632 to 1155

Tm: 78.7 C TaOpt: 55.1 C GC: 49.0

Sense Primer:

CGGGGAGAAGTCCTATGAGT

Similarity: 100.0%

Length: 20 Tm: 49.8 C GC: 55.0

dH: -152.0 kcal/mol dS: -394.5 cal/mol dG: -32.6 kcal/mol

Antisense Primer:

AGCACTACCAGGCCTTAAGG

Similarity: 100.0%

Length: 20 Tm: 50.5 C GC: 55.0

dH: -160.0 kcal/mol dS: -416.8 cal/mol dG: -34.0 kcal/mol

Tm Difference: 0.7

GC Difference: 0.0

V719I; GTC > ATC

TCC>TCT

Guide PAM

Primer

## PRIMERS

10014\_Zbtb20\_genof: CGGGGAGAAGTCCTATGAGT

10015\_Zbtb20\_genor: AGCACTACCAGGCCTTAAGG

Strain#: 408764

Request#: 552388

Animal ID: 4695- Female; 4698, 4726, 4727, 4728- Male

V719I KI

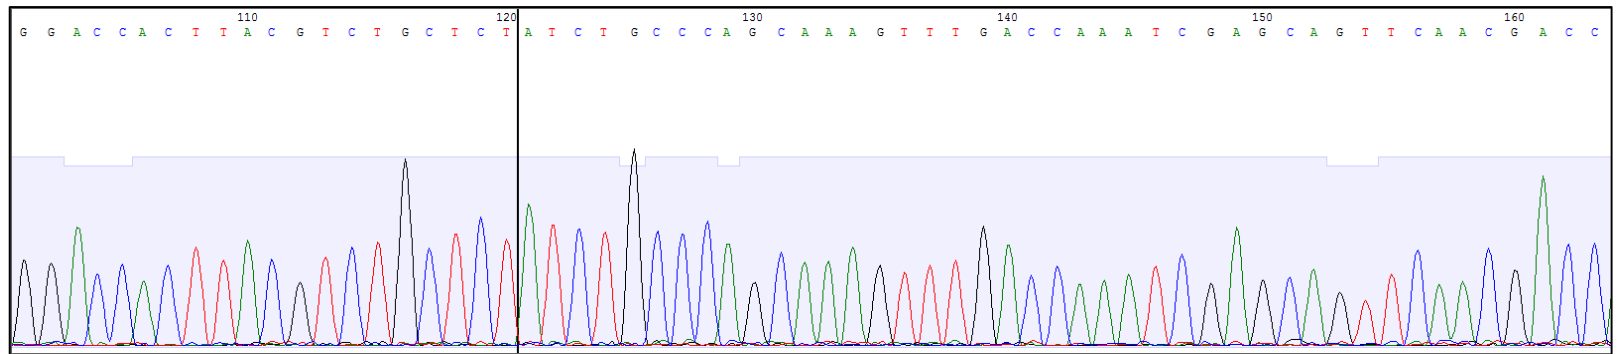

WT: GGACCACTTACGTCTGCTCCGTCTGCCAGCAAAGTTTGACCAAATCGAGCAGTTCAACGAC  
KI: GGACCACTTACGTCTGCTCTA TCTGCCAGCAAAGTTTGACCAAATCGAGCAGTTCAACGAC

TCC>TCT

V719I; GTC > ATC
